1           **A systematic review and meta-analysis on the effectiveness of an**  
2           **invasive strategy compared to a conservative approach in elderly**  
3           **patients with non-ST elevation acute coronary syndrome**

4  
5 Joan Dymphna P. Reaño, MD<sup>1</sup>, Maria Grethel C. Dimalala, MD<sup>2</sup>, Louie Alfred B. Shiu, MD<sup>3</sup>,  
6 Karen V. Miralles, MD<sup>3</sup>, Noemi S. Pestaño, MD<sup>3</sup>, Felix Eduardo R. Punzalan, MD<sup>3</sup>, Bernadette  
7 Tumanan-Mendoza, MD<sup>3</sup>, Michael Joseph T. Reyes, MD<sup>3,4</sup>, Rafael R. Castillo, MD<sup>3,5,6</sup>

8  
9 <sup>1</sup> Fellow in Adult Cardiology, Manila Doctors Hospital, Manila, Philippines

10 <sup>2</sup>Fellow in Interventional Cardiology, Manila Doctors Hospital, Manila, Philippines

11 <sup>3</sup> Consultant in Adult Cardiology, Manila Doctors Hospital, Manila, Philippines

12 <sup>4</sup> Consultant in Interventional Cardiology, Manila Doctors Hospital, Manila, Philippines

13 <sup>5</sup>Professor in Cardiovascular Medicine, Adventist University of the Philippines, Silang, Philippines

14 <sup>6</sup>Dean Emeritus, FAME Leaders Academy, Makati, Philippines

15  
16 ***Correspondence to:***

17 Dr. Joan Dymphna P Reaño, Manila Doctors Hospital, 667 United Nations Avenue, Ermita, Manila,  
18 Philippines

19 Email address: [jdp.reano@gmail.com](mailto:jdp.reano@gmail.com); [medicalfiles.inquirer@gmail.com](mailto:medicalfiles.inquirer@gmail.com)

20 Mobile tel. no.: +63 917 5089 757

21  
22 **Short/running title: Management strategies in elderly with NSTEMI**

23

24

25

26

27 **ABSTRACT**

28 **Background:** Elderly patients, 65 years old and older, largely represent (>50 %) of hospital-  
29 admitted patients with acute coronary syndrome (ACS). Data are conflicting comparing efficacy  
30 of early routine invasive (within 48-72 hours of initial evaluation) versus conservative  
31 management of ACS in this population.

32 **Objective:** We aimed to determine the effectiveness of routine early invasive strategy compared to  
33 conservative treatment in reducing major adverse cardiovascular events in elderly patients with  
34 non-ST elevation (NSTEMI) ACS.

35 **Data Sources:** We conducted a systematic review of randomized controlled trials through PubMed,  
36 Cochrane, and Google Scholar database.

37 **Study Selection:** The studies included were randomized controlled trials that evaluated the  
38 effectiveness of invasive strategy compared to conservative treatment among elderly patients  $\geq 65$   
39 years old diagnosed with NSTEMI/ACS. Studies were included if they assessed any of the following  
40 outcomes of death, cardiovascular mortality, myocardial infarction (MI), stroke, recurrent angina,  
41 and need for revascularization. Five articles were subsequently included in the meta-analysis.

42 **Data Extraction:** Three independent reviewers extracted the data of interest from the articles using  
43 a standardized data collection form that included study quality indicators. Disparity in assessment  
44 was settled by an independent adjudicator.

45 **Data Synthesis:** All pooled analyses were based on fixed effects model. A total of 2,495 patients  
46 were included, 1337 in the invasive strategy group, and 1158 in the conservative treatment group.

47 **Results:** Meta-analysis showed less incidence of revascularization in the invasive (2%) over  
48 conservative treatment groups (8%), with overall risk ratio of 0.31 (95% CI 0.16-0.61,  $I^2 = 0\%$ ).  
49 There was also less incidence of stroke in the invasive (2%) versus conservative group (3%) but  
50 this was not statistically significant. A significant benefit was noted in the reduction of all-cause

51 mortality (RR 0.63, 95% CI 0.55-0.72,  $I^2=84%$ ) and myocardial infarction (RR 0.62, 95% CI 0.49-  
52 0.79,  $I^2=63%$ ) but with significant heterogeneity.

53 **Conclusion:** There was a significantly lower rate of revascularization in the invasive strategy group  
54 compared to the conservative treatment group. In the reduction of all-cause mortality and MI, there  
55 was benefit favoring invasive strategy but with significant heterogeneity. These findings do not  
56 support the bias against early routine invasive intervention in the elderly group with NSTEMI/ACS.  
57 However, further studies focusing on the elderly with larger population sizes are still needed.

58

59 **Keywords:** *Elderly, non-ST Elevation myocardial infarction, acute coronary syndrome, invasive strategy,*  
60 *conservative treatment, coronary artery disease, ACS MACE, CVD in Philippines*

61

## 62 I. INTRODUCTION

63 Based on the World Health Organization's Global Burden of Disease report, ischemic heart  
64 disease (IHD) is the overall leading cause of death worldwide.<sup>1</sup> Although the annual number of  
65 hospital discharges for acute coronary syndromes (ACS) in developed countries has declined  
66 slowly over the past two decades, the number has increased in developing countries.<sup>2</sup> In the  
67 Philippines, cardiovascular disease (CVD) remains the leading cause of mortality.<sup>3</sup> The Philippine  
68 Heart Association ACS registry reported that ACS is prevalent in the age range 51-70, with mean  
69 age group of 66 years old.<sup>3</sup>

70 The most recent American College of Cardiology/American Heart Association  
71 (ACC/AHA 2014) and the European Society of Cardiology (ESC 2015) guidelines for non-ST  
72 segment elevation ACS (NSTEMI/ACS) reflect medical advancements in therapeutics and strategies  
73 of care leading to improved survival in ACS, but this was mainly observed in relatively younger  
74 individuals (<65 years of age) and in men. These guidelines emphasize intensive and early medical  
75 and interventional therapy, particularly for those at high risk.<sup>4,5,6</sup>

76 The 2014 AHA/ACC NSTEMI Guidelines generally recommend that older patients with  
77 NSTEMI should be treated with goal-directed medical therapy, together with an early invasive  
78 strategy, and revascularization as appropriate.<sup>5</sup> The 2015 ESC Guidelines for the Management of  
79 ACS, on the other hand, recommend that decisions on elderly patients with NSTEMI should be  
80 based on ischemic and bleeding risks, estimated life expectancy, comorbidities, quality of life,  
81 patient values and preferences, and the estimated risks and benefits of revascularization.<sup>6</sup> Despite  
82 the guidelines, older patients are less likely to undergo procedures after an NSTEMI than younger  
83 patients due in part to patient and practitioner concerns about the increased risk of  
84 complications.<sup>7,8,9</sup>

85 Due to conflicting results of studies, lack of specific recommendations from the  
86 abovementioned guidelines, and the paucity of data on early invasive strategy versus conservative  
87 treatment for NSTEMI in elderly patients, this meta-analysis was conducted to focus on this  
88 special population to compare benefits and risks of early invasive therapy versus conservative  
89 management.

90

## 91 **II. RESEARCH QUESTION**

---

92 Among elderly patients aged  $\geq 65$  years old with NSTEMI, how effective is invasive  
93 strategy compared to conservative treatment in preventing major adverse cardiovascular events  
94 (MACE)?

95

## 96 **III. OBJECTIVES**

---

97 **General:** To determine the effectiveness of invasive strategy compared to conservative treatment  
98 in reducing MACE among elderly patients with NSTEMI.

99

100

101 ***Specific:***

102 Among elderly patients with NSTEMI, to determine the effectiveness of invasive strategy  
103 compared to conservative treatment, in 6 months (short-term) to 3 years (long-term), in reducing:

- 104 a. Death or all-cause mortality;
- 105 b. Cardiovascular mortality;
- 106 c. Myocardial infarction (MI);
- 107 d. Stroke;
- 108 e. Recurrent angina;
- 109 f. Need for revascularization.

110

111 **IV. METHODOLOGY**

112 ***Study Registration***

113 Prior to the conduct of the research, the study was registered and approved by the  
114 Committee on Research (CORES) of Manila Doctors Hospital.

115 ***Criteria for considering studies for this review***

116 The studies included were randomized controlled trials that evaluated the effectiveness of  
117 invasive strategy compared to conservative treatment among elderly patients  $\geq 65$  years old  
118 diagnosed with NSTEMI. Studies were included if any of the outcomes assessed were: death,  
119 cardiovascular mortality, MI, stroke, recurrent angina, and need for revascularization.

120

121 ***Definition of terms:***

- 122 1. **Invasive strategy or early invasive strategy** –Routine early (within 48-72 hours of initial  
123 evaluation) cardiac catheterization, followed by PCI, CABG, or continuing medical  
124 therapy, depending on the coronary anatomy.

- 125        2. **Conservative treatment** - Initial optimal medical management, with cardiac  
126            catheterization reserved for patients with recurrent ischemia at rest or after a non-invasive  
127            stress test, followed by revascularization if the anatomy is suitable.
- 128        3. **Elderly patients** – Patients aged 65 years or older (WHO, 2000), with or without  
129            comorbidities.
- 130        4. **Non-ST elevation acute coronary syndrome (NSTEACS)** – Unstable angina, with or  
131            without ST segment depression on electrocardiogram with normal or raised blood  
132            concentration of troponin T or I. Elevated troponin was defined as a value exceeding the  
133            99th percentile of a normal population at the local laboratory at each participating site.

134

135    *Search methods for identification of studies*

136            Systematic computerized search (APPENDIX A) was performed using the Pubmed and  
137            Cochrane databases. MESH and free text of the following main key terms were used: “randomized  
138            controlled trials”, “elderly”, “non-ST elevation acute coronary syndrome”, “invasive strategy”,  
139            “conservative management”, “invasive strategy versus conservative strategy”, “major adverse  
140            cardiovascular events”, “all-cause mortality”, “cardiovascular mortality”, “myocardial infarction”,  
141            “stroke”, “recurrent angina”, “need for revascularization”. The last search was done on 10 August  
142            2017.

143            Eligibility assessment was performed independently in an unblinded standard manner by  
144            three reviewers. The literature search identified 322 possible articles. Of these, 69 were relevant,  
145            particularly they involved studies related to ACS. Prospective cohort studies and post hoc analyses  
146            were excluded. Of the 69 articles, 55 were excluded due to different intervention since they did not  
147            involve comparing invasive versus conservative management in ACS. After assessing 14 articles  
148            for eligibility, 8 articles with different population and methods were excluded (details for the titles  
149            of the studies and reasons for exclusion are listed in APPENDIX D). One article was possibly

150 eligible but did not report the event rates per treatment group. To access needed data in this  
151 particular study, correspondence with the author via email was done, but with no reply from the  
152 author until the time of writing. Five articles were subsequently included in the meta-analysis  
153 (Figure 1).

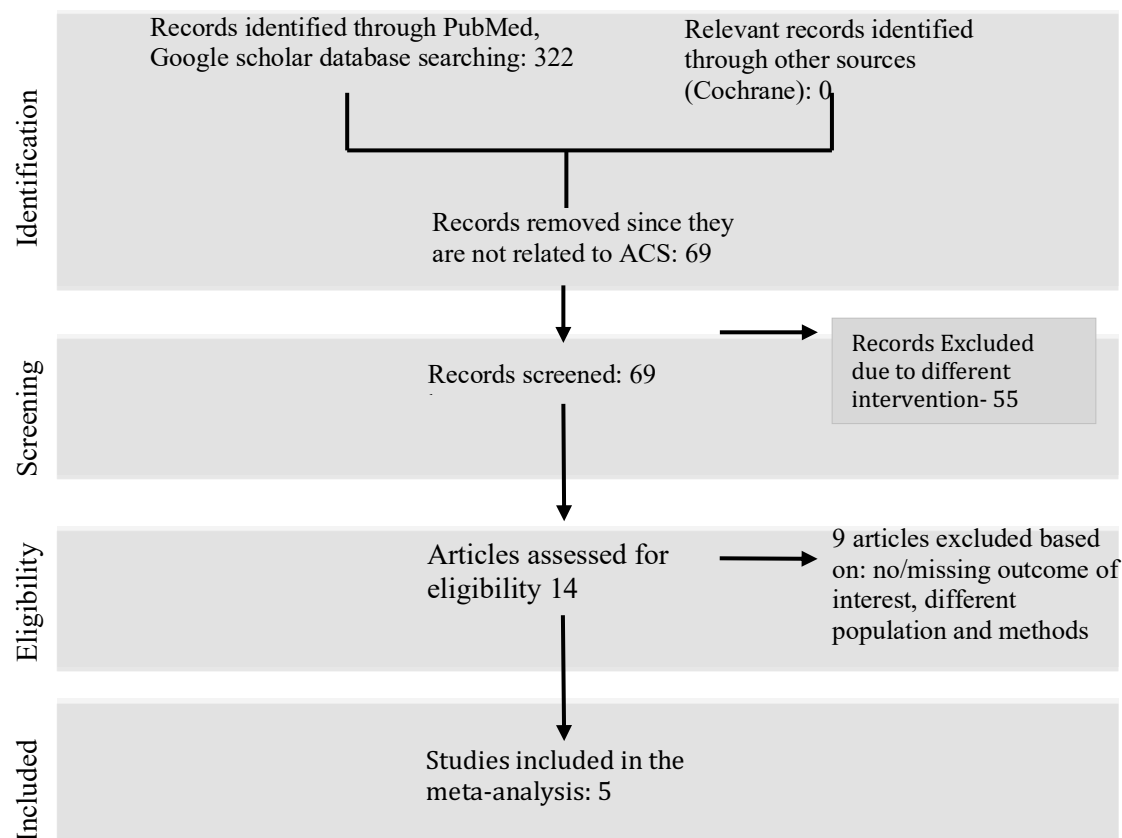

154

155 **Figure 1.** Search strategy for identification of studies

156

157 ***Assessment of risk bias of included trials:***

158 Three independent reviewers extracted the data of interest using a standardized data  
159 collection form and individually appraised each trial. The reviewers discussed the quality of  
160 included trials, outcomes to be collected, and risks of bias. Disparity in assessment was settled by  
161 an independent adjudicator. The assessment of random sequence generation, allocation  
162 concealment, incomplete outcome data, blinding of participants and personnel, blinding of outcome

163 assessment, and intention-to-treat analysis was done using the quality scale for meta-analytic  
 164 review, the Cochrane Collaboration Tool for Risk of Bias.

165

166 *Data analysis*

167 Review Manager 5.3 was used to analyze the data. Analysis of dichotomous data was done  
 168 using risk ratio, 95% confidence interval, and Mantel-Haenszel method with fixed effects model.  
 169 Heterogeneity between trials was tested using a standard Chi-square test and I<sup>2</sup> statistics. The p-  
 170 value of <0.10 was considered to be statistically significant and I<sup>2</sup> of ≥50% is considered to have  
 171 high heterogeneity.

172

173 *Description of studies*

174 Five randomized controlled trials involving a total of 2,495 patients met the inclusion  
 175 criteria. The data on population characteristics, intervention type, and measured outcomes were  
 176 extracted from each trial (Table 1). Four of the trials included elderly patients with NSTEMI  
 177 aged ≥ 70 years while one trial included patients ≥ 65 years old.<sup>10</sup> The studies compared the  
 178 effectiveness of early invasive strategy (treatment group) versus optimum medical treatment  
 179 (control group) in the management of NSTEMI in elderly patients.

180

181 **Table 1. Characteristics of included trials**

| Study ID                       | Population                                                                  |                                                                                                 | Intervention                                                                        | Outcome                                                                                  | Methods                                            |
|--------------------------------|-----------------------------------------------------------------------------|-------------------------------------------------------------------------------------------------|-------------------------------------------------------------------------------------|------------------------------------------------------------------------------------------|----------------------------------------------------|
| Sanchis et al., 2016<br>N= 106 | <b>Inclusion:</b><br>Patients ≥ 70 years old with significant comorbidities | <b>Exclusion:</b><br>1) Dynamic ST-segment changes;<br>2) Prior known non revascularizable CAD; | <b>Treatment Group:</b><br>Routine cardiac catheterization within 72 h of admission | <b>Primary:</b><br>Composite of all-cause mortality, recurrent myocardial infarction and | Open label multicenter randomized controlled trial |



|                                                         |                                                                                  |                                                                                                                                           |                                                                                                                                                                                                                     |                                                                                                                                                        |                                                                                  |
|---------------------------------------------------------|----------------------------------------------------------------------------------|-------------------------------------------------------------------------------------------------------------------------------------------|---------------------------------------------------------------------------------------------------------------------------------------------------------------------------------------------------------------------|--------------------------------------------------------------------------------------------------------------------------------------------------------|----------------------------------------------------------------------------------|
|                                                         | diagnosed with NSTEMI                                                            | 3) Concomitant heart disease different than ischemic heart disease; and<br>4) Life expectancy $\leq 1$ year.                              | <b>Control Group:</b><br>Only medical treatment, although cardiac catheterization was allowed in the case of poor in-hospital outcome                                                                               | readmission for cardiac cause<br><br><b>Secondary:</b><br>All-cause mortality, Reinfarction or Post-discharge revascularization, and bleeding episodes | (Follow-up of 3 to 36 months)                                                    |
| Tegn et. al, 2016<br><br>N= 457                         | <b>Inclusion:</b><br>Patients $\geq 80$ years old with NSTEMI or Unstable Angina | <b>Exclusion:</b><br>1) Clinically unstable;<br>2) Cardiogenic shock;<br>3) Continuing bleeding problems; or<br>4) Short life expectancy. | <b>Treatment Group:</b><br>Early coronary angiography (within 24 hours) with immediate assessment for adhoc PCI, CABG, or optimum medical treatment<br><br><b>Control Group:</b><br>Optimum medical treatment alone | <b>Primary:</b><br>Composite of MI, need for urgent revascularization stroke and death<br><br><b>Secondary:</b><br>Death from any cause                | Open label multicenter randomized controlled trial<br><br>(Follow-up of 3 years) |
| Puymirat et al., 2012<br><br>N=1,645 (total population) | <b>Inclusion criteria:</b><br>Men or women aged over 18 years (Includes          | <b>Exclusion:</b><br>1) Iatrogenic MI;<br>2) ACS diagnosis invalidated in favor                                                           | <b>Treatment Group:</b><br>Early coronary angiography<br><br><b>Control Group:</b>                                                                                                                                  | <b>Primary:</b><br>Mortality, Minor bleeding, and Major bleeding                                                                                       | Open label multicenter randomized controlled trial                               |

|                                        |                                                                                                                                                   |                                                                                                                                                                                                                                                                                                                                                                      |                                                                                                                                                                                                                                                                                                                                                                                                                                |                                                                                                                                                                                                      |                                                                       |
|----------------------------------------|---------------------------------------------------------------------------------------------------------------------------------------------------|----------------------------------------------------------------------------------------------------------------------------------------------------------------------------------------------------------------------------------------------------------------------------------------------------------------------------------------------------------------------|--------------------------------------------------------------------------------------------------------------------------------------------------------------------------------------------------------------------------------------------------------------------------------------------------------------------------------------------------------------------------------------------------------------------------------|------------------------------------------------------------------------------------------------------------------------------------------------------------------------------------------------------|-----------------------------------------------------------------------|
| n= 658<br>(elderly subgroup)           | Elderly Subgroup<br>> 75 years old),<br>who were<br>admitted within<br>48 h after<br>symptom onset<br>for an acute MI                             | of another<br>diagnosis; and<br>3) Patients with<br>unstable angina and<br>no increase in<br>cardiac biomarkers.                                                                                                                                                                                                                                                     | Received only<br>medical therapy                                                                                                                                                                                                                                                                                                                                                                                               |                                                                                                                                                                                                      | (Follow-up of<br>3 years)                                             |
| Savonnito, et<br>al, 2012<br><br>N=313 | <b>Inclusion:</b><br>Patients $\geq 75$<br>years old,<br>assessed to have<br>NSTEMACS with<br>cardiac ischemic<br>symptoms at rest<br>within 48 h | <b>Exclusion:</b><br>1) Secondary causes<br>of myocardial<br>ischemia;<br>2) Ongoing<br>myocardial ischemia<br>or heart failure<br>despite optimized<br>therapy;<br>3) PCI or CABG<br>within 30 days<br>before<br>randomization;<br>4) Serum creatinine<br>>2.5 mg/dl;<br>5) Cerebrovascular<br>accident within the<br>previous month;<br>6) Recent<br>transfusions; | <b>Treatment group:</b><br>Coronary<br>angiography within<br>72 h and, when<br>indicated, coronary<br>revascularization by<br>either PCI or CABG<br><br><b>Control Group:</b><br>Initially<br>conservative therapy<br>and coronary<br>angiography during<br>index hospital stay<br>was allowed in the<br>case of refractory<br>ischemia,<br>myocardial<br>(re)infarction, heart<br>failure of ischemic<br>origin, or malignant | <b>Primary:</b><br>Composite of all-<br>cause mortality,<br>non-fatal MI,<br>disabling stroke, and<br>repeat hospital stay<br>for cardiovascular<br>causes or severe<br>bleeding within 12<br>months | Open<br>randomized<br>controlled<br>trial<br>(Follow-up of<br>1 year) |

|                                                                                       |                                                                                                                                                                                                                    |                                                                                                                                                                                                                                                                                                     |                                                                                                                                                                                                                  |                                                                                                                                         |                                                                            |
|---------------------------------------------------------------------------------------|--------------------------------------------------------------------------------------------------------------------------------------------------------------------------------------------------------------------|-----------------------------------------------------------------------------------------------------------------------------------------------------------------------------------------------------------------------------------------------------------------------------------------------------|------------------------------------------------------------------------------------------------------------------------------------------------------------------------------------------------------------------|-----------------------------------------------------------------------------------------------------------------------------------------|----------------------------------------------------------------------------|
|                                                                                       |                                                                                                                                                                                                                    | <p>7) Gastrointestinal or genitourinary bleeding within 6 weeks before randomization;</p> <p>8) Platelet count &lt;90,000 cells/ul</p> <p>9) Ongoing oral anticoagulation</p> <p>10) Severe obstructive lung disease</p> <p>11) Malignancy;</p> <p>12) Neurological deficit limiting follow-up.</p> | <p>ventricular arrhythmias</p>                                                                                                                                                                                   |                                                                                                                                         |                                                                            |
| <p>Bach et al., 2004<br/>N=2, 220 (total population)<br/>n=962 (elderly subgroup)</p> | <p><b>Inclusion:</b><br/>Patients older than 18 years of age (with subgroup of <math>\geq 65</math> years old) with episode of angina in the preceding 24 hours;<br/>Candidates for coronary revascularization</p> | <p><b>Exclusion:</b><br/>1) Persistent ST-segment elevation;<br/>2) Secondary angina;<br/>3) Percutaneous coronary revascularization or coronary bypass surgery within the previous 6 months;</p>                                                                                                   | <p><b>Treatment Group:</b><br/>Coronary angiography 4 to 48 hours after randomization</p> <p><b>Control Group:</b><br/>Medical treatment;<br/>Coronary angiography was reserved for patients who had certain</p> | <p><b>Primary:</b><br/>Rates of 30-day and 6-month mortality, nonfatal MI, rehospitalization, stroke, and hemorrhagic complications</p> | <p>Open randomized controlled trial (Follow-up of 6 months and 1 year)</p> |

|  |  |                                                                                                                                                                                                                                                                                                                                                                                                                                                                      |                                                                                                        |  |  |
|--|--|----------------------------------------------------------------------------------------------------------------------------------------------------------------------------------------------------------------------------------------------------------------------------------------------------------------------------------------------------------------------------------------------------------------------------------------------------------------------|--------------------------------------------------------------------------------------------------------|--|--|
|  |  | <p>4) Unstable comorbidities;</p> <p>5) Left bundle-branch block or paced rhythm;</p> <p>6) Severe congestive heart failure or cardiogenic shock;</p> <p>7) Clinically important systemic disease;</p> <p>8) Serum creatinine concentration greater than 220 umol/L (&gt;2.5 mg/dL);</p> <p>9) Treatment with a glycoprotein IIb/IIIa antagonist within the past 96 hours; or</p> <p>10) Ongoing long-term treatment with ticlopidine, clopidogrel, or warfarin.</p> | <p>high-risk characteristics consistent with failure of medical therapy or stress-induced ischemia</p> |  |  |
|--|--|----------------------------------------------------------------------------------------------------------------------------------------------------------------------------------------------------------------------------------------------------------------------------------------------------------------------------------------------------------------------------------------------------------------------------------------------------------------------|--------------------------------------------------------------------------------------------------------|--|--|

182

183 In the treatment arm, four trials specified the time to intervention (4-72 hours)<sup>10,12,13,14</sup>.

184 Only one study did not specify the time to intervention but only mentioned “during initial

185 admission”.<sup>11</sup> Two out of the five trials included CABG as part of the intervention when  
 186 indicated.<sup>12,13</sup> In the control group all the trials used standard medical treatment .<sup>10-14</sup>

187 All trials assessed the outcome of all-cause mortality. All trials except one reported the  
 188 outcome of myocardial infarction.<sup>11</sup> All trials except two assessed the outcome of stroke.<sup>11,14</sup> The  
 189 outcomes of revascularization were reported by all except by two studies.<sup>10,11</sup> Lastly, the events of  
 190 cardiovascular death and recurrent angina were assessed only by one study.<sup>13</sup>

191 The Cochrane collaboration tool was used to assess the risk of bias. The random sequence  
 192 generation, allocation concealment, incomplete outcome data, blinding of participants and  
 193 personnel, blinding of outcome assessment, and intention-to-treat analysis were evaluated for each  
 194 trial. All included trials were assessed to have low risk for bias (Table 2).

195

196 **Table 2. Quality assessment table**

| <b>Study ID</b>      | <b>Method of Random Sequence Generation (Selection Bias)</b> | <b>Method of Allocation Concealment (Selection Bias)</b> | <b>Incomplete Outcome Data/Loss of participants to follow up (Attrition Bias)</b> | <b>Blinding of Participants and Personnel (Performance Bias)</b> | <b>Blinding of Outcome Assessment (Detection Bias)</b> | <b>Selective Reporting/ Intention to treat analysis (Reporting Bias)</b> |
|----------------------|--------------------------------------------------------------|----------------------------------------------------------|-----------------------------------------------------------------------------------|------------------------------------------------------------------|--------------------------------------------------------|--------------------------------------------------------------------------|
| Sanchis et al., 2016 | Low Risk                                                     | Low Risk                                                 | Low Risk                                                                          | Low Risk                                                         | Low Risk                                               | Low Risk                                                                 |
| Tegn et. Al, 2016    | Low Risk                                                     | Low Risk                                                 | Low Risk                                                                          | Low Risk                                                         | Low Risk                                               | Low Risk                                                                 |

|                        |          |          |          |          |          |          |
|------------------------|----------|----------|----------|----------|----------|----------|
| Puymirat et al., 2012  | Low Risk | Low Risk | Low Risk | Low Risk | Low Risk | Low Risk |
| Savonnito, et al, 2012 | Low Risk | Low Risk | Low Risk | Low Risk | Low Risk | Low Risk |
| Bach et al., 2004      | Low Risk | Low Risk | Low Risk | Low Risk | Low Risk | Low Risk |

197

198

199 **V. RESULTS**

200 **Effects of intervention on outcomes of interest**

201 **A. All-cause mortality**

202 A total of 242 among 1338 (18 %) elderly patients with NSTEMI died in the Invasive  
 203 Strategy Group; while 296 died among 1158 (26 %) patients in the Conservative Group (Figure 2).

204 The pooled analysis of all-cause mortality showed statistically significant benefit of invasive over  
 205 conservative strategy with an overall risk ratio of 0.63 (95% CI 0.55 to 0.72) but with significant  
 206 heterogeneity (p value of 0.0001, I<sup>2</sup> =84%).

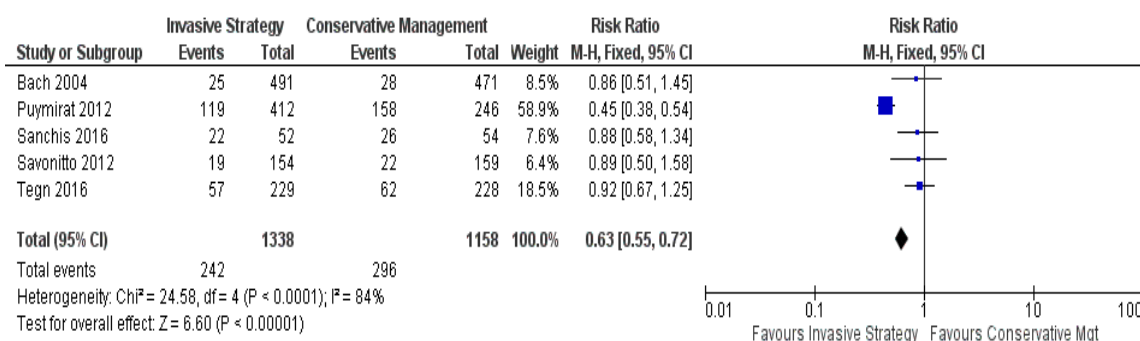

207

208 **Figure 2. Comparison between invasive and conservative strategy with the outcome of all-**  
 209 **cause mortality**

210

211

212 **B. Myocardial infarction**

213 In the Invasive Strategy Group, there were 89 events of MI among a total of 926 (10 %)  
 214 patients; while there were 142 among 912 (16 %) patients in the Conservative Group (Figure 3).  
 215 The pooled analysis showed that invasive strategy is beneficial over conservative treatment in  
 216 preventing MI with an overall risk ratio of 0.62 (95% CI 0.49 to 0.79) but with significant  
 217 heterogeneity (p value of 0.0001,  $I^2 = 63\%$ ).

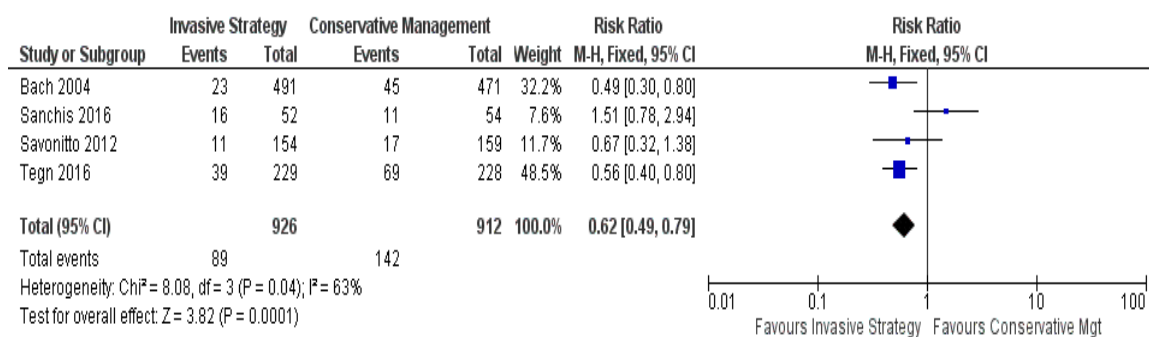

218

219 **Figure 3. Comparison between invasive and conservative strategy with the outcome of**  
 220 **myocardial infarction**

221

222 **C. Stroke**

223 Among the five trials, Savonitto et al. (2012), Tegn (2016), and Bach (2004) reported the  
 224 outcomes of stroke (Figure 4). In the Invasive Strategy Group, there were 13 events of stroke among  
 225 874 (2%) patients; while there were 24 among 858 (3%) patients in the Conservative Group. The  
 226 pooled analysis showed that early invasive strategy was favored over conservative treatment in  
 227 preventing stroke but no statistically significant benefit with overall risk ratio of 0.53 (95% CI 0.27-  
 228 1.03,  $I^2 = 0\%$ ).

229

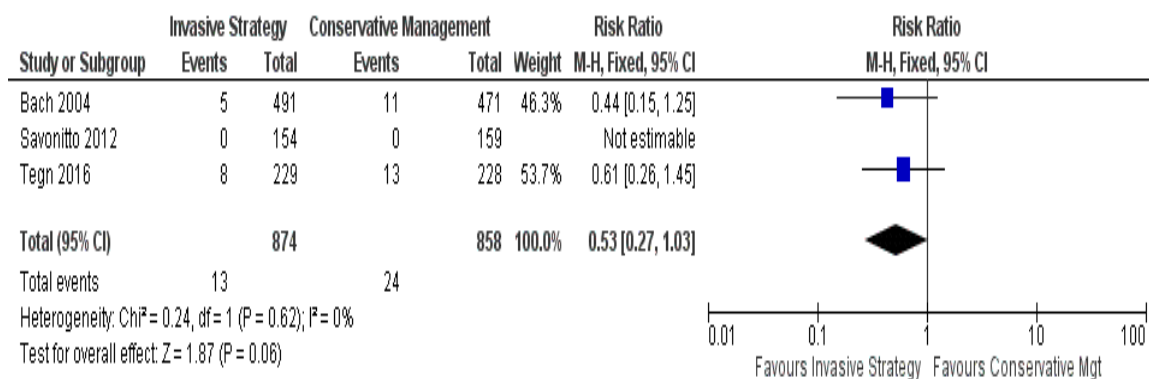

230

231 **Figure 4. Comparison between invasive and conservative strategy with the outcome of stroke**

232

233

234 **D. Need for revascularization**

235 In elderly patients with NSTEMACS, there were a total of 10 patients among 435 (2%) who  
 236 needed revascularization in the Invasive Group while there were 34 patients among 441 (8%) in  
 237 the Conservative Group (Figure 5). The pooled analysis for need for revascularization showed  
 238 statistically significant benefit with an overall risk ratio of 0.31 (95% CI 0.16 to 0.61) with no  
 239 significant heterogeneity (p value of 0.0006, I<sup>2</sup> = 0%).

240

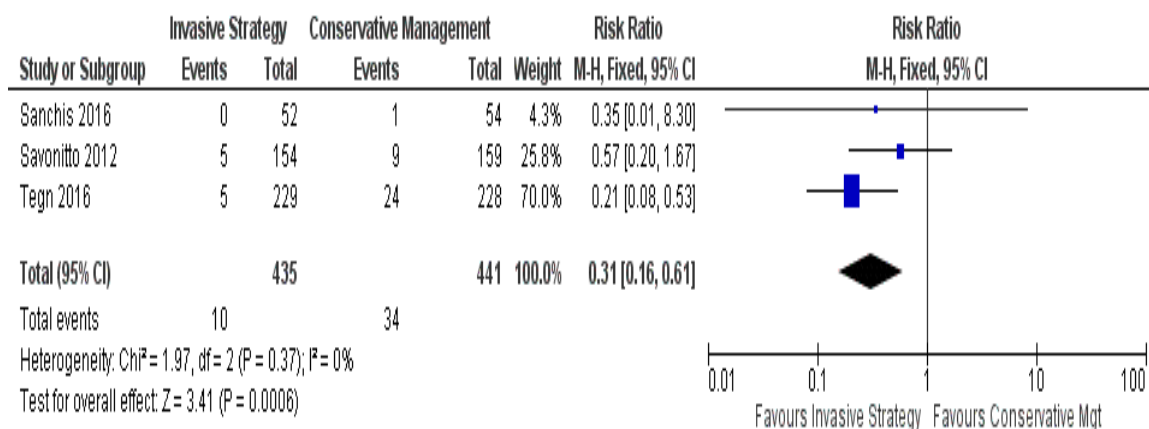

241

242 **Figure 5. Comparison between invasive and conservative strategy with the outcome of need**  
 243 **for revascularization**



244 ***E. Outcomes for cardiovascular mortality and recurrent angina***

245           Among the five trials, only one trial assessed the outcomes of cardiovascular mortality and  
246 recurrent angina.<sup>13</sup> The cardiovascular mortality incidence in the invasive versus the control group  
247 was 10% and 11 %, respectively, showing a non-statistically significant benefit of invasive over  
248 conservative treatment (RR 0.87, 95% CI, 0.49-1.56, p=0.65). Likewise, an invasive strategy  
249 showed a non-statistically significant benefit over conservative treatment in reducing recurrent  
250 angina (RR 0.81, 95% CI 0.45–1.46, p=0.49).

251

252 **VI. DISCUSSION**

253           Meta-analysis of data from the five trials included in this study showed that an early  
254 invasive strategy appears to be beneficial in suitable elderly patients  $\geq 65$  years old with NSTEMI/ACS.  
255 There was significantly less need for revascularization in the invasive strategy group compared to  
256 the conservative treatment group. This finding implies that more patients in the conservative group  
257 clinically worsened during their course in the ward, requiring revascularization. It is also possible  
258 that early anatomic definition of the diseased coronaries may help the attending physician optimize  
259 an appropriate evidence-based management of the patient. The studies that evaluated the outcomes  
260 of revascularization stated that the indications for revascularization in the conservative group were:  
261 positive pre-discharge stress test, poor in-hospital outcomes, recurrent ischemia, reinfarction,  
262 malignant ventricular arrhythmias, refractory angina, and heart failure.<sup>12-14</sup> Some patients who  
263 subsequently required revascularization could have probably been better off with an early invasive  
264 approach.

265           For the outcomes of death and MI, an invasive strategy showed a statistically significant  
266 benefit over conservative treatment but with significant heterogeneity. The possible sources of  
267 heterogeneity for the outcomes of death and MI may be the small number of events and sample  
268 sizes. In two studies, the elderly population was just a subgroup analysis of the total population.<sup>10-</sup>

269 <sup>11</sup> Hence, the population in the subgroup analysis may not be powered enough to detect the  
270 differences in the intervention and outcomes of interest. Furthermore, there were differences in age  
271 cutoffs and follow-up period. Two studies had age cutoffs of 75 years<sup>11,13</sup> while the other three  
272 studies had age cutoffs of 65, 70, and 80 years.<sup>10,12,14</sup> Possible clinical differences in outcomes may  
273 exist in these age brackets of the elderly population. In terms of follow-up periods, two studies had  
274 follow-up of 3 years<sup>11,12</sup>; one had follow-up period of 3 months to 3 years<sup>14</sup>; one had follow-up of  
275 1 year<sup>13</sup>; while one had follow-up of 6 months and 1 year<sup>10</sup>. However, despite the heterogeneity,  
276 data from these studies clustered on the direction towards benefit favoring invasive over  
277 conservative strategy.

278 In the reduction of stroke, invasive strategy showed benefit over conservative treatment  
279 but this was not statistically significant. The outcomes for cardiovascular mortality and recurrent  
280 angina were assessed only in one study<sup>13</sup>, which showed also a non-statistically significant benefit  
281 of invasive strategy over conservative treatment among elderly NSTEMI patients.

282 Overall, this study does not support the relatively conservative tendency when dealing with  
283 elderly patients with NSTEMI in real-life clinical setting. The elderly population is considered a  
284 high-risk group wherein more than half the mortality in NSTEMI occur<sup>5</sup> and a more aggressive  
285 approach in suitable patients may be more appropriate and beneficial. Among people who die of  
286 ischemic heart disease, 83% were >65 years of age.<sup>1</sup> This mortality rate is expected to increase in  
287 the forthcoming decades due to improving life expectancy of the elderly. Age is one of the most  
288 important predictors of risk in NSTEMI. Each 10-year increase in age results in a 75% increase  
289 in hospital mortality in ACS patients.<sup>15</sup> Despite the relatively higher risk in this age group, elderly  
290 ACS patients are under-represented in clinical trials such that subjects older than 75 years of age  
291 account for less than 10%, and those older than 85 years account for less than 2% of all NSTEMI  
292 subjects.<sup>7</sup> This highlights the need for more clinical trials and studies in this age group.

293 Data from the CRUSADE (Can Rapid Risk Stratification of Unstable Angina Patients  
294 Suppress Adverse Outcomes with Early Implementation of the American College of

295 Cardiology/American Heart Association Guidelines) registry showed that NSTEMI patients aged  
296  $\geq 65$  years who experienced an in-hospital major bleed had a 33% increased risk of 30-day  
297 mortality.<sup>16</sup> However, the advancement of equipment and technique has made PCI safer for even  
298 very elderly patients ( $\geq 90$  years of age) with high success rates and declining major bleeding risk.<sup>17</sup>

299

## 300 **VII. SUMMARY AND CONCLUSION**

301 Results of this meta-analysis suggest some benefits with an early invasive strategy  
302 compared to a conservative treatment approach in the management of elderly patients with  
303 NSTEMI. There was a significantly lower rate of revascularization in the invasive strategy group  
304 compared to the conservative treatment group. A statistically significant benefit favoring invasive  
305 strategy was also noted in the reduction of death and myocardial infarction but with significant  
306 heterogeneity. These findings do not support the bias against early routine invasive intervention in  
307 the elderly group with NSTEMI.

308 Although an early invasive strategy may be favorable among elderly patients presenting  
309 with NSTEMI, the certainty of benefit versus risk still needs to be supported by larger clinical  
310 trials and registries with uniform age cutoff for elderly, particularly  $\geq 65$  years old, to provide high  
311 generalizability and statistical power. Current risk scoring systems such as the GRACE (Global  
312 Registry of Acute Coronary Events) Score, TIMI (Thrombolysis in Myocardial Infarction) Risk  
313 Score, and CRUSADE Bleeding Score are recommended in the initial evaluation of elderly patients  
314 presenting with NSTEMI. A special risk scoring may be developed to more accurately identify  
315 those who are suitable for an early invasive strategy, with an expected larger outcome and survival  
316 benefit.

317

318

319

320

321 **VIII. ACKNOWLEDGEMENT**

322 The authors would like to thank God; other consultants in the Section of Cardiology,  
323 Department of Internal Medicine, Manila Doctors Hospital; family, and friends for their support  
324 and patience in making this meta-analysis possible.

325

326 **IX. DECLARATION OF CONFLICT OF INTEREST**

327 RRC: member of advisory board or speakers' pool of Servier, Boehringer Ingelheim,  
328 Menarini, LRI-Therapharma, Sanofi, UAP Pharma, Unilab; MTR: member of speakers' pool of  
329 Novartis, Servier, Astra Zeneca; the rest declare no conflict of interest.

330

331 **X. REFERENCES**

- 332 1. Murray CJ and AD Lopez. Measuring the Global Burden of Disease. *New England Journal of*  
333 *Medicine*. 2013;369:448-57. DOI: 10.1056/NEJMra1201534
- 334 2. Rosamond, WD, LE Chambless, G Heiss, TH Mosley, J Coresh, E Whitsel, et al: Twenty-two-  
335 year trends in incidence of myocardial infarction, coronary heart disease mortality, and case  
336 fatality in 4 US communities, 1987-2008. *Circulation* 125: 1848, 2012.
- 337 3. Lazaro, Victor. 2014 PHA Clinical Practice Guidelines for the Diagnosis and Management of  
338 Patients with Coronary Heart Disease. *ASEAN Heart Journal*. Vol. 24, no.1, 27 – 78 (2016)
- 339 4. American Heart Association. Older Americans and cardiovascular diseases— statistics. Available  
340 at: <http://www.americanheart.org/presenter>.
- 341 5. Amsterdam, EA, NK Wenger, RG Brindis, DE Casey, TG Ganiats, DR Holmes, et al. 2014  
342 AHA/ACC Guideline for the Management of Patients With Non–ST-Elevation Acute Coronary  
343 Syndromes. *Circulation*. 2014;130:e344-e426
- 344 6. Roffi, M., C. Patrono, JP Collet, C Mueller, M Valgimigli, F Andreotti, et al. 2015 ESC  
345 Guidelines for the management of acute coronary syndromes in patients presenting without  
346 persistent ST-segment elevation. *European Heart Journal* doi:10.1093/eurheartj/ehv320

- 347 7. Lee PY, Alexander KP, Hammill BG, Pasquali SK, and Peterson ED. Representation of elderly  
348 persons and women in published randomized trial of acute coronary syndromes. *JAMA*.  
349 2001;286:708 –713.
- 350 8. Avezum A, Makdisse M, Spencer F, Gore JM, Fox KA, Montalescot G, Eagle KA, White K,  
351 Mehta RH, Knobel E, Collet JP; GRACE Investigators. Impact of age on management and  
352 outcome of acute coronary syndrome: observations from the Global Registry of Acute Coronary  
353 Events (GRACE). *Am Heart J*. 2005;149:67–73.
- 354 9. Mann, DL, DP Zipes, P Libby, and R Bonow. Braunwald’s Heart Disease: A Textbook of  
355 Cardiovascular Medicine. 10<sup>th</sup> edition. 2015.
- 356 10. Bach RG, Cannon CP, Weintraub WS, DiBattiste PM, Demopoulos, LA, Anderson HV, et al. The  
357 effect of routine, early invasive management on outcome for elderly patients with non-ST-segment  
358 elevation acute coronary syndromes. *Ann Intern Med*. 2004;**141**:186–95.
- 359 11. Puymirat, E, Taldir G, Aissaoui N, Lemesle G, Lorgis L, Cuisset T, et al. Use of Invasive Strategy  
360 in Non-ST Segment Elevation Myocardial Infarction Is a Major Determinant of Improved Long-  
361 Term Survival: FAST MI (French Registry of Acute Coronary Syndrome). *JACC: Cardiovascular*  
362 *Interventions*, Vol. 5, No. 9. September 2012: 893-902
- 363 12. Tegn, N., Michael Abdelnoor, Lars Aaberge, K Endresen, P Smith, S Aakhus, et al. Invasive  
364 versus conservative strategy in patients aged 80 years or older with non-ST-elevation myocardial  
365 infarction or unstable angina pectoris (After Eighty study): an open-label randomised controlled  
366 trial *The Lancet*. January 12, 2016 [http://dx.doi.org/10.1016/S0140-6736\(15\)01166-6](http://dx.doi.org/10.1016/S0140-6736(15)01166-6)
- 367 13. Savonitto S, Cavallini C, Petronio AS, Murena E, Antonicelli R, Sacco A, et al.; Italian Elderly  
368 ACS Trial Investigators. Early aggressive versus initially conservative treatment in elderly  
369 patients with non-ST-segment elevation acute coronary syndrome: a randomized controlled trial.  
370 *JACC Cardiovasc Interventions*. 2012;5:906–16.
- 371 14. Sanchis J, Nuñez E, Barrabes JA, Marin F, Consuegra-Sanchez L, Ventura S, et al, Randomized  
372 comparison between the invasive and conservative strategies in comorbid elderly patients with  
373 non-ST elevation myocardial infarction, *Eur J Intern Med* (2016),  
374 <http://dx.doi.org/10.1016/j.ejim.2016.07.003>

375 15. Xuming DAI, JB Whitehead, and KP Alexander. Acute coronary syndrome in the older adults. *J*  
 376 *Geriatr Cardiol* 2016; 13: 101-108. doi:10.11909/j.issn.1671-5411.2016.02.012  
 377 16. Lopes RD, Subherwal S, Holmes DN, Thomas L, Wang TY, Rao SV, et al. The association of in-  
 378 hospital major bleeding with short-, intermediate-, and long-term mortality among older patients  
 379 with non-ST-segment elevation myocardial infarction. *Eur Heart J* 2012;33:2044-2053.  
 380 17. Dai, Xuming, J. Busby-Whitehead, and KP Alexander. Acute coronary syndrome in the older  
 381 adults. *J Geriatr Cardiol* 2016; 13: 101-108. doi:10.11909/j.issn.1671-5411.2016.02.012

382

383

384

385 **XI. APPENDIX**

386 **APPENDIX A: PubMed Search Strategy**

| Recent queries in pubmed |                                                                             |             |          |
|--------------------------|-----------------------------------------------------------------------------|-------------|----------|
| Search                   | Query                                                                       | Items found | Time     |
| #100                     | Search (#42 AND #66 AND #99 AND #20)                                        | 322         | 21:35:50 |
| #99                      | Search (#92 OR #93 OR #94 OR #95 OR #96 OR #97 OR #98)                      | 3218012     | 21:26:41 |
| #98                      | Search (#90 OR #91)                                                         | 50047       | 21:25:23 |
| #97                      | Search (#88 OR #89)                                                         | 4189        | 21:25:01 |
| #96                      | Search (#80 OR #81 OR #82 OR #83 OR #84 OR #85 OR #86 OR #87 OR #88 OR #89) | 344281      | 21:24:32 |
| #95                      | Search (#75 OR #76 OR #77)                                                  | 1549850     | 21:22:53 |
| #94                      | Search (#72 OR #73 OR #74)                                                  | 831057      | 21:21:59 |
| #93                      | Search (#69 OR #70 OR #71)                                                  | 1563389     | 21:21:19 |
| #92                      | Search (#67 OR #68)                                                         | 13679       | 21:20:30 |
| #91                      | Search revascularization                                                    | 50047       | 21:18:20 |
| #90                      | Search need for revascularization                                           | 3465        | 21:18:06 |
| #89                      | Search recurrent chest pain                                                 | 2911        | 21:17:56 |

|     |                                                               |         |          |
|-----|---------------------------------------------------------------|---------|----------|
| #88 | Search recurrent angina                                       | 2673    | 21:17:31 |
| #87 | Search cvd hemorrhage                                         | 229     | 21:17:19 |
| #86 | Search cvd bleed                                              | 210     | 21:17:04 |
| #85 | Search cvd infarct                                            | 2332    | 21:16:47 |
| #84 | Search cerebral bleed                                         | 72121   | 21:16:36 |
| #83 | Search cerebral hemorrhage                                    | 53180   | 21:16:24 |
| #82 | Search cerebral infarct                                       | 49028   | 21:16:10 |
| #81 | Search cerebrovascular event                                  | 3648    | 21:16:00 |
| #80 | Search cerebrovascular accident                               | 275080  | 21:15:40 |
| #79 | Search cerebrovascular disease                                | 338376  | 21:15:16 |
| #78 | Search stroke                                                 | 272396  | 21:15:01 |
| #77 | Search heart attack                                           | 229883  | 21:14:43 |
| #76 | Search MI                                                     | 1344629 | 21:14:23 |
| #75 | Search myocardial infarction                                  | 223305  | 21:14:04 |
| #74 | Search cardiac death                                          | 720781  | 21:13:45 |
| #73 | Search cardiovascular death                                   | 95393   | 21:13:23 |
| #72 | Search cardiovascular mortality                               | 151179  | 21:13:03 |
| #71 | Search death                                                  | 720781  | 21:12:35 |
| #70 | Search mortality                                              | 1044577 | 21:12:15 |
| #69 | Search all-cause mortality                                    | 28210   | 21:11:59 |
| #68 | Search MACE                                                   | 6872    | 21:11:32 |
| #67 | Search major adverse cardiovascular events                    | 9103    | 21:09:35 |
| #66 | Search (#61 OR #62 OR #63 OR #64 OR #65)                      | 6249    | 21:08:38 |
| #65 | Search Invasive Therapy Conservative Therapy                  | 4294    | 21:07:35 |
| #64 | Search Invasive Treatment versus Conservative Treatment       | 294     | 21:07:20 |
| #63 | Search Invasive Management versus Conservative Management     | 183     | 21:07:07 |
| #62 | Search Invasive Strategy versus Conservative Strategy         | 125     | 21:06:53 |
| #61 | Search (#59 AND #60)                                          | 2471    | 21:06:15 |
| #60 | Search (#51 OR #52 OR #53 OR #54 OR #55 OR #56 OR #57 OR #58) | 125297  | 21:05:05 |
| #59 | Search (#43 OR #44 OR #45 OR #46 OR #49 OR #50)               | 111701  | 21:03:38 |
| #58 | Search Optimal Medical Therapy                                | 42410   | 20:59:57 |
| #57 | Search Optimal Medical Management                             | 19244   | 20:59:42 |
| #56 | Search Optimal Medical Treatment                              | 48204   | 20:59:31 |

|     |                                                                                           |         |          |
|-----|-------------------------------------------------------------------------------------------|---------|----------|
| #55 | Search Optimal Medical Strategy                                                           | 4920    | 20:58:27 |
| #54 | Search Conservative Therapy                                                               | 67332   | 20:58:09 |
| #53 | Search Conservative Treatment                                                             | 56611   | 20:57:58 |
| #52 | Search Conservative Management                                                            | 66213   | 20:57:43 |
| #51 | Search Conservative Strategy                                                              | 3336    | 20:57:30 |
| #50 | Search CABG                                                                               | 15615   | 20:57:16 |
| #49 | Search Coronary Artery Bypass Graft                                                       | 64717   | 20:56:56 |
| #46 | Search PTCA                                                                               | 41266   | 20:56:38 |
| #45 | Search Coronary Angioplasty                                                               | 46901   | 20:56:19 |
| #44 | Search Percutaneous Coronary Angioplasty                                                  | 21942   | 20:55:58 |
| #43 | Search Invasive Strategy                                                                  | 9348    | 20:55:34 |
| #42 | Search (#40 AND #41)                                                                      | 52265   | 20:53:53 |
| #41 | Search (#28 OR #29 OR #30 OR #31 OR #32 OR #33 OR #34 OR #35 OR #36 OR #37 OR #38 OR #39) | 118669  | 20:53:22 |
| #40 | Search (#21 OR #22 OR #23 OR #24 OR #25 OR #26 OR #27)                                    | 7732231 | 20:51:38 |
| #39 | Search Q-wave myocardial infarction                                                       | 3366    | 20:49:40 |
| #38 | Search Q-wave MI                                                                          | 757     | 20:49:29 |
| #37 | Search UA                                                                                 | 17483   | 20:49:13 |
| #36 | Search unstable angina                                                                    | 17732   | 20:48:59 |
| #35 | Search ACS                                                                                | 63075   | 20:48:41 |
| #34 | Search acute coronary syndrome                                                            | 25819   | 20:48:28 |
| #33 | Search non-Q wave myocardial infarction                                                   | 1631    | 20:48:10 |
| #32 | Search non-Q wave MI                                                                      | 400     | 20:47:57 |
| #31 | Search NSTEMI                                                                             | 2072    | 20:47:39 |
| #30 | Search non-st elevation myocardial infarction                                             | 8832    | 20:47:25 |
| #29 | Search NSTEACS                                                                            | 228     | 20:47:10 |
| #28 | Search non-st elevation acute coronary syndrome                                           | 2893    | 20:46:51 |
| #27 | Search more than or equal to 65 years old                                                 | 3404034 | 20:46:33 |
| #26 | Search (65 years old and above)                                                           | 845     | 20:46:04 |
| #25 | Search super centenarian                                                                  | 491     | 20:45:49 |
| #24 | Search centenarian                                                                        | 752696  | 20:45:34 |
| #23 | Search Advanced age                                                                       | 4671906 | 20:43:19 |
| #22 | Search old                                                                                | 898369  | 20:42:56 |
| #21 | Search elderly                                                                            | 4686863 | 20:42:37 |



|     |                                                                                                                                                            |         |          |
|-----|------------------------------------------------------------------------------------------------------------------------------------------------------------|---------|----------|
| #20 | Search (#1 OR #2 OR #3 OR #4 OR #5 OR #6 OR #7 OR #8 OR #9 OR #10 OR #11 OR #12 OR #13 OR #14 OR #15 OR #16 OR #17 OR #18 OR #19)                          | 9528711 | 20:42:17 |
| #19 | Search (Not (animals [mh] NOT human [mh]))                                                                                                                 | 4353823 | 20:40:33 |
| #18 | Search volunteer* [tw]                                                                                                                                     | 180971  | 20:40:13 |
| #17 | Search prospectiv* [tw]                                                                                                                                    | 709909  | 20:40:00 |
| #16 | Search control* [tw]                                                                                                                                       | 4598941 | 20:39:43 |
| #15 | Search prospective studies [mh]                                                                                                                            | 445018  | 20:39:27 |
| #14 | Search follow-up studies [mh]                                                                                                                              | 569279  | 20:39:03 |
| #13 | Search evaluation studies [mh] Schema: all                                                                                                                 | 0       | 20:38:42 |
| #12 | Search evaluation studies [mh]                                                                                                                             | 0       | 20:38:41 |
| #11 | Search comparative study [mh] Schema: all                                                                                                                  | 0       | 20:38:18 |
| #10 | Search comparative study [mh]                                                                                                                              | 0       | 20:38:18 |
| #9  | Search research design [mh:noexp]                                                                                                                          | 92025   | 20:38:05 |
| #8  | Search (((((singl* [tw] OR doubl* [tw] OR treb* [tw] OR tripl* [tw] AND (mask* [tw] OR blind* [tw])) OR (placebos [mh] OR placebo* [tw] OR random* [tw]))) | 1225171 | 20:37:46 |
| #7  | Search ("clinical trial" [tw])                                                                                                                             | 640470  | 20:37:25 |
| #6  | Search clinical trials [mh]                                                                                                                                | 303191  | 20:36:57 |
| #5  | Search clinical trial [pt]                                                                                                                                 | 767368  | 20:36:46 |
| #4  | Search single-blind method                                                                                                                                 | 39999   | 20:36:26 |
| #3  | Search double-blind method [mh]                                                                                                                            | 140472  | 20:36:09 |
| #2  | Search random allocation [mh]                                                                                                                              | 90997   | 20:35:54 |
| #1  | Search randomized controlled trials [mh]                                                                                                                   | 111611  | 20:35:19 |

387

388

389

390

391

392

393

394

## APPENDIX B.

395

### Sample Data Extraction Template

| Trial ID | Extractor | Year of publication |
|----------|-----------|---------------------|
| Title    |           |                     |
| Authors  |           |                     |
| Citation |           |                     |

396

397

### Participants

|                                                                                                            |
|------------------------------------------------------------------------------------------------------------|
| <p><b>Inclusion criteria:</b></p><br><br><br><br><br><br><br><br><br><br><p><b>Exclusion criteria:</b></p> |
|------------------------------------------------------------------------------------------------------------|

398

399

**Intervention**

**Treatment group:**

  
  
  
  
  
  
  
  
  
  

**Control/Comparison group:**

400

401

**Method**

402

403

404

**Quality assessment/ Risk of Bias Table**

| Domain                                                                                 | Judgement<br>Low Risk/ High Risk/ Unclear | Support for Judgement/<br>Description |
|----------------------------------------------------------------------------------------|-------------------------------------------|---------------------------------------|
| Method of Random<br>sequence<br>Generation<br>(Selection Bias)                         |                                           |                                       |
| Method of<br>allocation<br>Concealment<br>(Selection Bias)                             |                                           |                                       |
| Incomplete<br>Outcome Data/Loss<br>of participants to<br>follow up (Attrition<br>Bias) |                                           |                                       |
| Blinding of<br>Participants and<br>Personnel<br>(Performance Bias)                     |                                           |                                       |
| Blinding of<br>Outcome<br>Assessment<br>(Detection Bias)                               |                                           |                                       |

|                                                                            |  |  |
|----------------------------------------------------------------------------|--|--|
| Selective Reporting/<br>Intention to treat<br>analysis (Reporting<br>Bias) |  |  |
| Other Bias                                                                 |  |  |

405

406

**Outcomes**

407

|   | Outcome Measures<br>(Dichotomous) | <i>Total =</i>            |       |                      |       |
|---|-----------------------------------|---------------------------|-------|----------------------|-------|
|   |                                   | Intervention group<br>n = |       | Control group<br>n = |       |
|   |                                   | Events                    | total | events               | Total |
|   | Primary:                          |                           |       |                      |       |
| 1 |                                   |                           |       |                      |       |
|   | Secondary:                        |                           |       |                      |       |

|   |  |  |  |  |  |
|---|--|--|--|--|--|
|   |  |  |  |  |  |
| 2 |  |  |  |  |  |
| 3 |  |  |  |  |  |

408

409

410

411

### APPENDIX C.

412

#### Summary of Results of the Five Included Randomized Controlled Trials

413

##### Tegn et al., 2016. After Eighty Study

414

Invasive versus conservative strategy in patients aged 80 years or older with non-ST-elevation myocardial infarction or

415

unstable angina pectoris (After Eighty study): an open-label randomised controlled trial

416

|   | Outcome Measures<br>(Dichotomous) | <i>Total = 457</i>            |       |                          |       |
|---|-----------------------------------|-------------------------------|-------|--------------------------|-------|
|   |                                   | Intervention group<br>n = 229 |       | Control group<br>n = 228 |       |
|   |                                   | Events                        | Total | Events                   | Total |
| 1 | All-Cause Mortality               | 57                            | -     | 62                       | -     |

|   |                            |              |   |              |   |
|---|----------------------------|--------------|---|--------------|---|
| 2 | Cardiovascular Mortality   | Not reported |   | Not reported |   |
| 3 | Myocardial infarction      | 39           | - | 69           | - |
| 4 | Stroke                     | 8            | - | 13           | - |
| 5 | Recurrent angina           | Not reported | - | Not reported | - |
| 6 | Need for revascularization | 5            | - | 24           | - |

417

418

**Sanchis et al., 2016.**

419

Randomized comparison between the invasive and conservative strategies in comorbid

420

elderly patients with non-ST elevation myocardial infarction

|   | Outcome Measures (Dichotomous) | <i>Total = 106</i>           |       |                         |       |
|---|--------------------------------|------------------------------|-------|-------------------------|-------|
|   |                                | Intervention group<br>n = 52 |       | Control group<br>n = 54 |       |
|   |                                | Events                       | Total | Events                  | Total |
| 1 | All-Cause Mortality            | 22                           | -     | 26                      | -     |
| 2 | Cardiovascular Mortality       | Not reported                 | -     | Not reported            |       |
| 3 | Myocardial infarction          | 16                           | -     | 11                      | -     |
| 4 | Stroke                         | Not reported                 | -     | Not reported            | -     |
| 5 | Recurrent angina               | Not reported                 | -     | Not reported            | -     |
| 6 | Need for revascularization     | 0                            | -     | 1                       | -     |

421

422

423

424

425

426

**Savonitto et al., 2012.**

427

Early Aggressive Versus Initially Conservative Treatment in Elderly Patients With Non-ST-Segment Elevation Acute

428

Coronary Syndrome

|   | Outcome Measures<br>(Dichotomous) | <i>Total = 313</i>            |       |                          |       |
|---|-----------------------------------|-------------------------------|-------|--------------------------|-------|
|   |                                   | Intervention group<br>n = 154 |       | Control group<br>n = 159 |       |
|   |                                   | events                        | Total | Events                   | Total |
| 1 | All-Cause Mortality               | 19                            |       | 22                       |       |
| 2 | Cardiovascular Mortality          | 16                            |       | 17                       |       |
| 3 | Myocardial infarction             | 11                            |       | 17                       |       |
| 4 | Stroke                            | 0                             |       | 0                        |       |
| 5 | Recurrent angina                  | 0                             |       | 4                        |       |
| 6 | Need for revascularization        | 5                             |       | 9                        |       |

429

430

**Puymirat et al., 2012. FAST-MI**

431

Use of Invasive Strategy in Non-ST-Segment Elevation Myocardial Infarction Is a Major Determinant of Improved

432

Long-Term Survival

433

FAST-MI (French Registry of Acute Coronary Syndrome)

|   | Outcome Measures<br>(Dichotomous)<br><br>In the Subgroup > 75<br>years old | <i>Total = 658</i>            |       |                          |       |
|---|----------------------------------------------------------------------------|-------------------------------|-------|--------------------------|-------|
|   |                                                                            | Intervention group<br>n = 412 |       | Control group<br>n = 246 |       |
|   |                                                                            | Events                        | Total | Events                   | Total |
| 1 | All-Cause Mortality                                                        | 119                           | -     | 158                      | -     |



|   |                            |              |   |              |   |
|---|----------------------------|--------------|---|--------------|---|
| 2 | Cardiovascular Mortality   | Not reported | - | Not reported |   |
| 3 | Myocardial infarction      | Not reported | - | Not reported | - |
| 4 | Stroke                     | Not reported | - | Not reported | - |
| 5 | Recurrent angina           | Not reported | - | Not reported | - |
| 6 | Need for revascularization | Not reported | - | Not reported | - |

434

435

**Bach et al., 2004.**

436

The Effect of Routine, Early Invasive Management on Outcome for Elderly Patients with Non-ST Segment Elevation

437

Acute Coronary Syndromes

|   | Outcome Measures (Dichotomous) at 6 Months | <i>Total = 962</i>            |       |                          |       |
|---|--------------------------------------------|-------------------------------|-------|--------------------------|-------|
|   |                                            | Intervention group<br>n = 491 |       | Control group<br>n = 471 |       |
|   |                                            | Events                        | Total | Events                   | Total |
| 1 | All-Cause Mortality                        | 5.3 % (25)                    | -     | 5.9% (28)                | -     |
| 2 | Cardiovascular Mortality                   | Not reported                  | -     | Not reported             |       |
| 3 | Myocardial infarction                      | 4.7 % (23)                    | -     | 9.6 % (45)               | -     |
| 4 | Stroke                                     | Not reported                  | -     | Not reported             | -     |
| 5 | Recurrent angina                           | Not reported                  | -     | Not reported             | -     |
| 6 | Need for revascularization                 | Not reported                  | -     | Not reported             | -     |

438

439

**APPENDIX D.**

440

**Excluded Studies and Reasons for Exclusion**

441

| <b>EXCLUDED STUDY</b>                                                                                                                                                                                                                                                                                                                                                                        | <b>REASON FOR EXCLUSION</b>                                                                                                                                                                                                                                                                                           |
|----------------------------------------------------------------------------------------------------------------------------------------------------------------------------------------------------------------------------------------------------------------------------------------------------------------------------------------------------------------------------------------------|-----------------------------------------------------------------------------------------------------------------------------------------------------------------------------------------------------------------------------------------------------------------------------------------------------------------------|
| <p><b>Early Invasive Versus Selective Strategy for Non–ST-Segment Elevation Acute Coronary Syndrome: The ICTUS Trial</b></p> <p>Hoedemaker, MD, Damman, MD, de Winter, MD, et al. Journal of the American College of Cardiology Vol. 69, No. 15, 2017.</p> <p><a href="http://dx.doi.org/10.1016/j.jacc.2017.02.023">http://dx.doi.org/10.1016/j.jacc.2017.02.023</a></p>                    | <p>&gt; Population: “mean age of the patients in our study was 62 years with relatively few patients older than 80 years”</p> <p>&gt; Outcome: Study presented the number and treatment assignment of patients in the age subgroup &gt; 65 years but did not state the number of outcomes seen per treatment arm.</p> |
| <p><b>5-year outcomes in the FRISC-II randomised trial of an invasive versus a non-invasive strategy in non-ST-elevation acute coronary syndrome: a follow-up study</b></p> <p>Lagerqvist et al. <i>Lancet</i> 2006; 368: 998–1004</p>                                                                                                                                                       | <p>&gt;Population: Patients were excluded if they were at an advanced age (older than 75 years)</p>                                                                                                                                                                                                                   |
| <p><b>Interventional versus conservative treatment for patients with unstable angina or non-ST-elevation myocardial infarction: the British Heart Foundation RITA 3 randomised trial</b></p> <p>Fox et al. <i>Lancet</i> 2002; Vol 360; No. 9349, p 1971-1972.</p> <p>DOI: <a href="http://dx.doi.org/10.1016/S0140-6736(02)11864-2">http://dx.doi.org/10.1016/S0140-6736(02)11864-2</a></p> | <p>&gt;Population: Did not specify age in the patient selection but described the included population to have a mean age of 62 years</p> <p>&gt;Outcome: Did not report age subgroup results</p>                                                                                                                      |
| <p><b>Elderly patients with myocardial infarction selected for conservative or invasive treatment strategy.</b></p> <p>Libungan B, Karlsson T, Albertsson P, Herlitz J.</p>                                                                                                                                                                                                                  | <p>&gt;Population: Included STEMI patients</p> <p>&gt;Method: Retrospective Study</p>                                                                                                                                                                                                                                 |

|                                                                                                                                                                                                                                                                                                                                                                                                                                                                                                                                       |                                                     |
|---------------------------------------------------------------------------------------------------------------------------------------------------------------------------------------------------------------------------------------------------------------------------------------------------------------------------------------------------------------------------------------------------------------------------------------------------------------------------------------------------------------------------------------|-----------------------------------------------------|
| <p>Clin Interv Aging. 2015 Jan 21;10:321-7. doi:<br/>10.2147/CIA.S74012. eCollection 2015.</p>                                                                                                                                                                                                                                                                                                                                                                                                                                        |                                                     |
| <p><b>Invasive strategy in non-ST elevation acute coronary syndromes: risks and benefits in an elderly population.</b></p> <p>Lourenço C, Teixeira R, Antonio N, Saraiva F, Baptista R, Jorge E, Monteiro S, Gonçalves F, Monteiro P, Matos V, Calisto J, Faria H, Gonçalves L, Freitas M, Providência LA.</p> <p>Rev Port Cardiol. 2010 Oct;29(10):1451-72. English, Portuguese.</p>                                                                                                                                                 | <p>&gt;Method: Observational longitudinal study</p> |
| <p><b>Influence of age on use of cardiac catheterization and associated outcomes in patients with non-ST-elevation acute coronary syndromes.</b></p> <p>Bagnall AJ, Goodman SG, Fox KA, Yan RT, Gore JM, Cheema AN, Huynh T, Chauret D, Fitchett DH, Langer A, Yan AT; Canadian Acute Coronary Syndrome Registry I and II Investigators; Canadian Global Registry of Acute Coronary Events (GRACE/GRACE2) Investigators.</p> <p>Am J Cardiol. 2009 Jun 1;103(11):1530-6. doi:<br/>10.1016/j.amjcard.2009.01.369. Epub 2009 Apr 8.</p> | <p>&gt;Method: Retrospective Study</p>              |
| <p><b>Effect of an invasive strategy on in-hospital outcome in elderly patients with non-ST-elevation myocardial infarction.</b></p> <p>Bauer T, Koeth O, Jünger C, Heer T, Wienbergen H, Gitt A, Zahn R, Senges J, Zeymer U; Acute Coronary Syndromes Registry (ACOS) Investigators.</p> <p>Eur Heart J. 2007 Dec;28(23):2873-8. Epub 2007 Nov 2.</p>                                                                                                                                                                                | <p>&gt;Method: Retrospective Study</p>              |

|                                                                                                                                                                                                                                                                                                                                                                                                                                             |                                                                                                                 |
|---------------------------------------------------------------------------------------------------------------------------------------------------------------------------------------------------------------------------------------------------------------------------------------------------------------------------------------------------------------------------------------------------------------------------------------------|-----------------------------------------------------------------------------------------------------------------|
| <p><b>Interventional versus conservative treatment in acute non-ST elevation coronary syndrome: time course of patient management and disease events over one year in the RITA 3 trial.</b></p> <p>Poole-Wilson PA, Pocock SJ, Fox KA, Henderson RA, Wheatley DJ, Chamberlain DA, Shaw TR, Clayton TC; Randomised Intervention Trial of unstable Angina Investigators.</p> <p>Heart. 2006 Oct;92(10):1473-9. Epub 2006 Apr 18.</p>          | <p>&gt;Population: Included STEMI patients</p> <p>&gt;Method: Post-Hoc Analysis</p>                             |
| <p><b>Early invasive versus ischaemia-guided strategies in the management of non-Q wave myocardial infarction patients with and without prior myocardial infarction; results of Veterans Affairs Non-Q Wave Infarction Strategies in Hospital (VANQWISH) trial.</b></p> <p>Heggunje PS, Wade MJ, O'Rourke RA, Kleiger RE, Deedwania PC, Lavori PW, Boden WE; VANQWISH trial investigators.</p> <p>Eur Heart J. 2000 Dec;21(24):2014-25.</p> | <p>&gt;Population and method: Non-Q wave MI patients with prior MI versus patients with first non-Q wave MI</p> |

442
